# Supplementary material for: The Effect of Age and Comorbidities: Children vs. Adults in Their Response to SARS-CoV-2 Infection
Source: MDPI journal article supplement (doi:10.3390/v16050801), 2024-05-17
Supplement: s1 [file s1]

Supplementary Table 1. Profile of PCR-positive participants with an IgG titer <15 AU/mL

| Identifier <sup>1</sup> | IgG Titer 1 (AU/mL) | Vaccination (Yes/No) | IgG Titer 2 (AU/mL) | Age <sup>2</sup> (years) | COVID-19 symptoms | Any comorbidity (Yes/No) | Comorbidity present               |
|-------------------------|---------------------|----------------------|---------------------|--------------------------|-------------------|--------------------------|-----------------------------------|
| 1                       | 3.8                 | No                   | N/A                 | 1.5                      | Mild              | Yes                      | Prematurity; IUGR                 |
| 2                       | 4.4                 | No                   | N/A                 | 1.7                      | Mild              | No                       | ---                               |
| 3                       | 3.8                 | No                   | N/A                 | 12.1                     | Moderate          | Yes                      | Asthma                            |
| 4                       | 3.8                 | No                   | N/A                 | 16.0                     | Asymptomatic      | Yes                      | Scleroderma                       |
| 5                       | 5.2                 | No                   | 5.4                 | 32.2                     | Asymptomatic      | Yes                      | HIV                               |
| 6                       | 9.4                 | No                   | N/A                 | 36.1                     | Asymptomatic      | No                       | ---                               |
| 7                       | 8.4                 | No                   | N/A                 | 37.5                     | Mild              | No                       | ---                               |
| 8                       | 12.4                | Yes                  | 166.0               | 39.8                     | Mild              | Yes                      | Asthma; Chronic sinusitis; Anemia |
| 9                       | 13.8                | No                   | 8.3                 | 40.1                     | Mild              | Yes                      | HIV                               |
| 10                      | 12.9                | No                   | N/A                 | 43.2                     | Mild              | Yes                      | Hepatitis B                       |
| 11                      | 7.3                 | No                   | N/A                 | 46.8                     | Moderate          | Yes                      | HIV                               |
| 12                      | 7.9                 | No                   | 12.3                | 48.4                     | Mild              | No                       | ---                               |
| 13                      | 11.8                | Yes                  | 400.0               | 48.7                     | Mild              | Yes                      | HIV                               |

<sup>1</sup>No two of the above patients belonged to the same family.

<sup>2</sup>Age at first IgG measurement
